# Supplementary material
Source: HighWire-hosted journal article supplement (https://www.cmajopen.ca/highwire/filestream/80820/field_highwire_adjunct_files/0/open-2014-0017-checklist.pdf)
Supplement: open-2014-0017-checklist.pdf [file open-2014-0017-checklist.pdf]

**STROBE Statement: The effects of HIV-1 subtype and ethnicity on CD4 decline in antiretroviral naïve patients: a Canadian-European collaborative cohort study**

|                              | <b>Item No</b> | <b>Recommendation</b>                                                                                                                                                                                                                                                                                                                                                                                                                                                                                                       |
|------------------------------|----------------|-----------------------------------------------------------------------------------------------------------------------------------------------------------------------------------------------------------------------------------------------------------------------------------------------------------------------------------------------------------------------------------------------------------------------------------------------------------------------------------------------------------------------------|
| <b>Title and abstract</b>    | 1              | (a) Indicate the study’s design with a commonly used term in the title or the abstract<br><a href="#">In title</a><br>(b) Provide in the abstract an informative and balanced summary of what was done and what was found<br><a href="#">Done</a>                                                                                                                                                                                                                                                                           |
| <b>Introduction</b>          |                |                                                                                                                                                                                                                                                                                                                                                                                                                                                                                                                             |
| Background/rationale         | 2              | Explain the scientific background and rationale for the investigation being reported<br><a href="#">Introduction - second paragraph</a>                                                                                                                                                                                                                                                                                                                                                                                     |
| Objectives                   | 3              | State specific objectives, including any prespecified hypotheses<br><a href="#">Introduction - final paragraph</a>                                                                                                                                                                                                                                                                                                                                                                                                          |
| <b>Methods</b>               |                |                                                                                                                                                                                                                                                                                                                                                                                                                                                                                                                             |
| Study design                 | 4              | Present key elements of study design early in the paper<br><a href="#">Methods - first paragraph; Table 1</a>                                                                                                                                                                                                                                                                                                                                                                                                               |
| Setting                      | 5              | Describe the setting, locations, and relevant dates, including periods of recruitment, exposure, follow-up, and data collection<br><a href="#">Methods - second and third paragraphs</a>                                                                                                                                                                                                                                                                                                                                    |
| Participants                 | 6              | <i>Cohort study</i> —Give the eligibility criteria, and the sources and methods of selection of participants. Describe methods of follow-up<br><a href="#">Table 1 - references given for each contributing cohort</a>                                                                                                                                                                                                                                                                                                      |
| Variables                    | 7              | Clearly define all outcomes, exposures, predictors, potential confounders, and effect modifiers.<br><a href="#">Methods - first paragraph; Statistical Analysis - first paragraph</a>                                                                                                                                                                                                                                                                                                                                       |
| Data sources/<br>measurement | 8*             | For each variable of interest, give sources of data and details of methods of assessment (measurement). Describe comparability of assessment methods if there is more than one group<br><a href="#">Methods - second paragraph; Table 1</a>                                                                                                                                                                                                                                                                                 |
| Bias                         | 9              | Describe any efforts to address potential sources of bias<br><a href="#">Methods - third paragraph; Statistical Analysis - second paragraph</a>                                                                                                                                                                                                                                                                                                                                                                             |
| Study size                   | 10             | Explain how the study size was arrived at<br><a href="#">Results - first paragraph</a>                                                                                                                                                                                                                                                                                                                                                                                                                                      |
| Quantitative variables       | 11             | Explain how quantitative variables were handled in the analyses. If applicable, describe which groupings were chosen and why<br><a href="#">Not relevant</a>                                                                                                                                                                                                                                                                                                                                                                |
| Statistical methods          | 12             | (a) Describe all statistical methods, including those used to control for confounding<br><a href="#">Statistical Analysis - first and second paragraphs</a><br>(b) Describe any methods used to examine subgroups and interactions<br><a href="#">Statistical Analysis - second paragraph</a><br>(c) Explain how missing data were addressed<br><a href="#">Results - third paragraph; Table 3</a><br>(d) <i>Cohort study</i> —If applicable, explain how loss to follow-up was addressed<br><a href="#">Not applicable</a> |

(e) Describe any sensitivity analyses  
Statistical analysis - second paragraph

## Results

|                  |     |                                                                                                                                                                                                                                                                                                                                                                                                                                                                                                                                                                                                         |
|------------------|-----|---------------------------------------------------------------------------------------------------------------------------------------------------------------------------------------------------------------------------------------------------------------------------------------------------------------------------------------------------------------------------------------------------------------------------------------------------------------------------------------------------------------------------------------------------------------------------------------------------------|
| Participants     | 13* | (a) Report numbers of individuals at each stage of study—eg numbers potentially eligible, examined for eligibility, confirmed eligible, included in the study, completing follow-up, and analysed<br><u>Results - first and third paragraphs</u><br>(b) Give reasons for non-participation at each stage<br><u>Results - first and third paragraphs</u><br>(c) Consider use of a flow diagram                                                                                                                                                                                                           |
| Descriptive data | 14* | (a) Give characteristics of study participants (eg demographic, clinical, social) and information on exposures and potential confounders<br><u>Table 2</u><br>(b) Indicate number of participants with missing data for each variable of interest<br><u>Tables 2 and 3</u><br>(c) <i>Cohort study</i> —Summarise follow-up time (eg, average and total amount)<br><u>Results - first paragraph; Table 2</u>                                                                                                                                                                                             |
| Outcome data     | 15* | <i>Cohort study</i> —Report numbers of outcome events or summary measures over time<br><u>Table 7</u>                                                                                                                                                                                                                                                                                                                                                                                                                                                                                                   |
| Main results     | 16  | (a) Give unadjusted estimates and, if applicable, confounder-adjusted estimates and their precision (eg, 95% confidence interval). Make clear which confounders were adjusted for and why they were included<br><u>Statistical Analysis - first paragraph; Table 4</u><br>(b) Report category boundaries when continuous variables were categorized<br><u>Not applicable</u><br>(c) If relevant, consider translating estimates of relative risk into absolute risk for a meaningful time period<br><u>Not relevant - however untransformed results presented in Table 5 for ease of interpretation</u> |
| Other analyses   | 17  | Report other analyses done—eg analyses of subgroups and interactions, and sensitivity analyses<br><u>Results - paragraphs four, five and six</u>                                                                                                                                                                                                                                                                                                                                                                                                                                                        |

## Discussion

|                  |    |                                                                                                                                                                                                  |
|------------------|----|--------------------------------------------------------------------------------------------------------------------------------------------------------------------------------------------------|
| Key results      | 18 | Summarise key results with reference to study objectives<br><u>Discussion - first paragraph</u>                                                                                                  |
| Limitations      | 19 | Discuss limitations of the study, taking into account sources of potential bias or imprecision. Discuss both direction and magnitude of any potential bias<br><u>Limitations</u>                 |
| Interpretation   | 20 | Give a cautious overall interpretation of results considering objectives, limitations, multiplicity of analyses, results from similar studies, and other relevant evidence<br><u>Conclusions</u> |
| Generalisability | 21 | Discuss the generalisability (external validity) of the study results<br><u>Limitations</u>                                                                                                      |

## Other information

|         |    |                                                                                                                                                                                                        |
|---------|----|--------------------------------------------------------------------------------------------------------------------------------------------------------------------------------------------------------|
| Funding | 22 | Give the source of funding and the role of the funders for the present study and, if applicable, for the original study on which the present article is based<br><u>Financial Disclosure statement</u> |
|---------|----|--------------------------------------------------------------------------------------------------------------------------------------------------------------------------------------------------------|
